# Supplementary material for: Marine monitoring in Europe: is it adequate to address environmental threats and pressures?
Source: Copernicus journal article supplement (doi:10.5194/os-2019-75), 2019-07-11
Supplement: Supplementary file 1 [file os-2019-75-supplement.pdf]

## *Supplementary material S1*

### *Content and structure of online questionnaire*

Dear WP1 partners,

As agreed at the KO meeting, all participants in WP1 are expected to act as national representatives and support the gathering of background information that is required to develop the JERICO-RI science strategy. Through Task 1.1, a questionnaire has now been developed to obtain this background information. The objectives of Task 1.1 are to identify the main environmental problems and threats within European coastal waters, and to gather a comprehensive (meta)database on current monitoring programmes operated in Europe for the purposes of the WFD and MSFD. A key aspect of the task is the identification of any gaps in monitoring.

This questionnaire is now being distributed to you as national representative.

You are required to respond to the questionnaire to the best of your knowledge and/or take responsibility for completion of the questionnaire.

In some cases, it may be necessary to pass the form on to the relevant institutions or authorities within country. You may also forward the questionnaire to colleagues outside your country and not members of the JERICO-NEXT consortium, if you would find it appropriate. In the latter case, please inform Suzanne Painting and/or Kate Collingridge at CEFAS.

In addition to knowledge at regional and national level, we strongly recommend to use outcomes of other EU projects that focuses on threats in EU waters (ex: EU BON, DEVOTES, KNOWSEAS, etc.), when appropriate.

The questionnaire has been developed in a format which facilitates database analysis of the information returned. It needs to be completed (and submitted) online, using Google forms, and includes two linked forms/questionnaires.

1. The [first questionnaire](#) is to identify threats in European Seas, and to assess whether existing monitoring programs are adequate.
2. The [second questionnaire](#) is to provide information on current monitoring programmes. This form includes a link to a [spreadsheet](#) so that information on monitoring stations can be provided.

Click on the link to begin the questionnaire/s: [Environmental Threats and Monitoring](#). Instructions are provided in the questionnaire, and some tips for completing it are attached to this email.

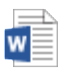

JNEXT\_1.1\_Tips for  
completing the que:

### **FORM 1 Threats and gaps in monitoring**

#### **SECTION 1**

**Q1 Name\***

Please provide the name of the person filling in the questionnaire

**Q3 Email address\***

Please provide the email address of the person filling in the questionnaire

**Q4 Institute/affiliation\***

Please provide the institute or affiliation of the person filling in the questionnaire

**Q5 Country** (select one)

- Albania
- Belgium
- Bulgaria
- Cyprus
- Denmark
- Estonia
- Finland
- France
- Germany
- Greece
- Ireland
- Italy
- Latvia
- Lithuania
- Malta
- Montenegro
- Netherlands
- Norway
- Poland
- Portugal
- Romania
- Russia
- Slovenia
- Spain
- Sweden
- Turkey
- Ukraine
- United Kingdom

**Q6 Region** (select one)

*(A drop-down list includes regions defined in various ways, e.g. territorial/national/EEZ waters, by ICES, by HELCOM, etc. Some regions have linked sub-regions.)*

| <b>Region</b>                                 | <b>Go to section</b>              |
|-----------------------------------------------|-----------------------------------|
| 1 Baltic Sea                                  | 2 (Baltic Sea Subregions)         |
| 2 Belt Sea                                    | 12 (Threats)                      |
| 3 The Sound                                   | 12 (Threats)                      |
| 4 Kattegat                                    | 12 (Threats)                      |
| 5 Skaggerak                                   | 12 (Threats)                      |
| I Barents Sea                                 | 12 (Threats)                      |
| II Norwegian Sea, Spitzbergen and Bear Island | 3 (Norwegian Sea Subregions)      |
| IV North Sea                                  | 4 (North Sea Subregions)          |
| V Iceland and Faroes Grounds                  | 5 (Region V Subregions)           |
| VI Rockall and West of Scotland               | 6 (Region VI Subregions)          |
| VII Celtic Seas                               | 7 (Region VII Subregions)         |
| VIII Bay of Biscay                            | 8 (Region VIII Subregions)        |
| IX Portuguese Waters                          | 9 (Region IX Subregions)          |
| Mediterranean Sea                             | 10 (Mediterranean Sea Subregions) |

|                           |                           |
|---------------------------|---------------------------|
| Black Sea                 | 11 (Black Sea Subregions) |
| Territorial Waters (12nm) | 12 (Threats)              |
| EEZ/National Waters       | 12 (Threats)              |
| North East Atlantic       | 12 (Threats)              |
| Other                     | 12 (Threats)              |

**Section 2 Baltic Sea Subregions** (select multiple)

- 1.1 Gulf of Bothnia
- 1.2 Gulf of Finland
- 1.3 Gulf of Riga
- 1.4 Baltic Proper
- 2.1 Bay of Mecklenburg
- 2.2 Kiel Bay
- 2.3 Little Belt
- 2.4 Great Belt

Other

*Go to section 12 (Threats)*

**Section 3 Norwegian Sea Subregions** (select multiple)

- IIa Norwegian Sea
- IIb Spitzbergen and Bear Island

Other

*Go to section 12 (Threats)*

**Section 4 North Sea Subregions** (select multiple)

- IVa Northern North Sea
- IVb Central North Sea
- IVc Southern North Sea

Other

*Go to section 12 (Threats)*

**Section 5 Region V Subregions** (select multiple)

- Va Iceland Grounds
- Vb Faroes Grounds

Other

*Go to section 12 (Threats)*

**Section 6 Region VI Subregions** (select multiple)

- VIa NW Coast of Scotland and N Ireland
- VIb Rockall

Other

*Go to section 12 (Threats)*

**Section 7 Region VII Celtic Seas Subregions** (select multiple)

- VIIa Irish Sea
- VIIb West of Ireland
- VIIc Porcupine Bank
- VIIId Eastern English Channel
- VIIe Western English Channel
- VIIIf Bristol Channel
- VIIg Celtic Sea North
- VIIh Celtic Sea South
- VIIj SW of Ireland – East
- VIIk SW of Ireland – West

Other

*Go to section 12 (Threats)*

**Section 8 Region VIII Subregions** (select multiple)

- VIIIa Bay of Biscay – North
- VIIIb Bay of Biscay – Central

VIIIc Bay of Biscay – South  
VIII d Bay of Biscay- Offshore  
VIII e West Bay of Biscay  
IXa Portuguese Waters – East  
IXb Portuguese Waters – West  
Other  
*Go to section 12 (Threats)*

**Section 9 Region IX Subregions** (select multiple)

IXa Portuguese Waters – East  
IXb Portuguese Waters – West  
Other  
*Go to section 12 (Threats)*

**Section 10 Mediterranean Sea Subregions** (select multiple)

1 Northern Alboran Sea  
2 Alboran Island  
3 Southern Alboran Sea  
4 Algeria  
5 Balearic Islands  
6 Northern Spain  
7 Gulf of Lyons  
8 Corsica Island  
9 Ligurian and North Tyrrhenian Sea  
10 South Tyrrhenian Sea  
11 Sardinia  
12 Northern Tunisia  
13 Gulf of Hammamet  
14 Gulf of Gabes  
15 Malta Island  
16 South of Sicily  
17 Northern Adriatic Sea  
18 Southern Adriatic Sea  
19 Western Ionian Sea  
20 Eastern Ionian Sea  
21 Southern Ionian Sea  
22 Aegean Sea  
23 Crete Island  
24 North Levant  
25 Cyprus Island  
26 South Levant  
27 Levant  
28 Marmara Sea  
Other  
*Go to section 12 (Threats)*

**Section 11 Black Sea Subregions** (select multiple)

29 Black Sea  
30 Asov Sea  
Other  
*Go to section 12 (Threats)*

**Section 12 Threats**

Threats to the marine environment are considered here in terms of 'pressures' and 'impacts'. Pressures are the human activities which have impacts on ecosystems or parts thereof. Impacts may become threats, but should be able to be linked back to the original pressure. Checklists of pressures and impacts are given below. Multiple options can be selected. Other pressures and impacts can also be added, and details can be given to provide explanation/s.

**Q1 Pressures** (select multiple)

What are the main pressures from human activities that are affecting the environment in this area? Details can be given below.

- Construction/Obstruction
- Shipping
- Mining
- Dumping
- Extraction (e.g. of aggregates such as gravels or sand)
- Abstraction (removal of water, e.g. for aquaculture)
- Marine litter
- Aquaculture
- Contaminants
- Inorganic nutrient enrichment
- Organic enrichment
- Atmospheric inputs
- Fishing
- Dredging of biota (e.g. scallops, clams)
- Regime change (thermal)
- Regime change (salinity)
- Other

**Q2 (free text)**

Please provide any necessary details on the above pressures

**Q3 Impacts (select multiple)**

What are the impacts resulting from the pressures identified above?

- Physical damage (abrasion, material extraction)
- Changes in hydrology
- Underwater noise disturbance
- Changes in sediment/substrate composition
- Habitat loss or destruction
- Changes in suspended sediments/turbidity
- Changes in light availability
- Contamination (with harmful substances etc)
- Biofouling
- Invasive species
- Harmful micro-organisms (such as harmful algal blooms)
- Increased or decreased primary production (e.g. by phytoplankton or macroalgae)
- Undesirable disturbances (e.g. oxygen depletion due to nutrient enrichment (eutrophication))
- Population change/depletion of standing stock
- Changes in species range
- Changes in community composition
- Mortality of marine life
- Other

**Q4 (free text)**

Please provide any necessary details on the above impacts

**Q5 Policy Purposes (select multiple)**

What are the main policy or other drivers behind the monitoring programme/s? These may be international conventions, EU Directives, national policies, or other requirements.

- Marine Strategy Framework Directive (MSFD)
- OSPAR
- Water Framework Directive (WFD)
- Urban Waste Water Treatment Directive (UWWTD)
- Local
- Other:

**Q6 MSFD Descriptors (select multiple)**

The MSFD includes 11 qualitative descriptors. Please link the threats identified to these descriptors, or any others which may be relevant in the area.

- 1 Biodiversity

- 2 Non-native species
- 3 Fish
- 4 Food Webs
- 5 Eutrophication
- 6 Sea Floor Integrity
- 7 Hydrographic conditions
- 8 Contaminants in water
- 9 Contaminants in food
- 10 Marine Litter
- 11 Energy

**Q7** Please name any relevant monitoring programmes(s) \* (free text)

If there are multiple programs, please separate by commas. A form is provided at the end of the questionnaire to provide details of the programme/s. If there is no relevant monitoring, type 'none'.

**Q7** Are existing monitoring programmes sufficient to assess the effects of the environmental threats in the considered area? (select one)

- Yes
- No
- Partly

**Q7a** If no (or partly), please explain how they are deficient (free text)

For example, no monitoring in the area considered, inadequate monitoring of parameters, insufficient spatial or temporal resolution of the monitoring

**Q7B** If no (or partly), please suggest what would be appropriate in terms of monitoring to assess the impact of the considered threats (free text)

Please go to the monitoring form to enter details of the monitoring programmes (one form submission per monitoring programme), using the link below.

<http://goo.gl/forms/ZZyCrZEU2w1ouFw22>

## **FORM 2 Monitoring programmes**

*Please complete one form entry per monitoring programme*

**Section 1 Country** (select one)

- Albania
- Belgium
- Bulgaria
- Cyprus
- Denmark
- Estonia
- Finland
- France
- Germany
- Greece
- Ireland
- Italy
- Latvia
- Lithuania
- Malta
- Montenegro
- Netherlands
- Norway
- Poland

- Portugal
- Romania
- Russia
- Slovenia
- Spain
- Sweden
- Turkey
- Ukraine
- United Kingdom

## Section 2 Monitoring details

### Q1 Monitoring program name

#### Q2 Is this monitoring program a statutory/official program or an 'unofficial' project/program?

E.g. An 'official' monitoring program contributes towards obligations under various legal instruments and is likely to be funded by the government/state; an 'unofficial' program includes monitoring for other reasons and is likely to rely on other sources of funding (e.g. EU, commercial).

#### Q3 Variables measured\* (select multiple)

- Temperature
- Salinity
- Nutrients
- Dissolved Gases
- Chlorophyll
- pH
- Plankton
- Benthos
- Macroalgae
- Hydrography
- Contaminants
- Litter
- Fish

#### Q4 Platform types (select multiple)

- Shore based
- Research Vessel
- Voluntary Observing Ship (VOS)
- Small Boat
- Ferrybox (fixed transects)
- Ferrybox (cruise of opportunity)
- Fixed platform
- Remote Sensing
- Autonomous vehicle (ROV, AUV, Glider etc)
- Other

#### Q5 Number of stations

Total approximate number of stations monitored

#### Q6 Is monitoring regular or ad hoc?

- Regular
- Ad hoc
- Other

#### Q7 If monitoring is regular, what is the monitoring frequency?

- Continuous
- Hourly
- Daily
- Weekly
- Monthly

- Annually

**Q8 Start date**

**Q9 End date**

If ongoing please enter today's date

**Q10 If the monitoring program has ended, please provide a reason.**

E.g. funding not renewed, threats no longer present so monitoring not required.

**Monitoring stations**

To provide details of the location etc of monitoring stations please follow the link:

[https://docs.google.com/spreadsheets/d/126UXCWvEIVwigo6N\\_1Im6yAgD4YDU2IAPy-CmshEjbo/edit?usp=sharing](https://docs.google.com/spreadsheets/d/126UXCWvEIVwigo6N_1Im6yAgD4YDU2IAPy-CmshEjbo/edit?usp=sharing)

**Comments** (free text)

**Section 3 Data Access**

**Q1 Data access restrictions**

Are there restrictions on data access?

- Yes
- No

**Q2 Data access details** (short answer text)

Details of data access restrictions

**Q3 Responsible organisation** (short answer text)

**Q4 Responsible person** (short answer text)

**Q5 Postal address** (short answer text)

**Q6 Email address** (short answer text)

**Q7 Phone number** (short answer text)

**Q8 Data source institute(s)** (short answer text)

**Q9 Database** (select multiple)

Database to which the monitoring data are submitted

- BODC MERMAN
- ICES DOME
- EMODNET
- EA
- Local
- Other

**Q10 Data flows** (select one)

Are data flows to central data holders (e.g. ICES) established and up to date?

- Yes
- No
- Other

**Q11 Web links**

Link to online location of data

**Q12 Comments** (free text)

**Q9 Research Database** (select multiple)

Complementary oceanographic or research databases



- BODC NODB
- ICES OCEAN
- Local
- Other

**Q10 Research Data flows** (select one)

Are data flows to central data holders (e.g. ICES) established and up to date?

- Yes
- No
- Other

**Q11 Web links**

Link to online location of data

**Q12 Research Comments** (free text)
